# Supplementary material for: Machine learning-based screening of Mn-PNP catalysts for the CO2 reduction reaction using a region-wise ligand-encoded feature matrix
Source: Royal Society of Chemistry journal article supplement (doi:10.1039/d3ya00520h), 2024-01-01
Supplement: d3ya00520h1.pdf [file d3ya00520h1.pdf]

## Supplementary Information

# Machine Learning-based Screening of Mn-PNP Catalysts for CO<sub>2</sub> Reduction Reaction Using Region-wise Ligand-encoded Feature Matrix

Amitabha Das,<sup>†‡</sup> Diptendu Roy,<sup>†‡</sup> Shyama Charan Mandal,<sup>‡‡</sup> and Biswarup Pathak<sup>‡\*</sup>

<sup>‡</sup>Department of Chemistry, Indian Institute of Technology Indore, Indore 453552, India

<sup>‡</sup>Present address: SUNCAT Center for Interface Science and Catalysis, Department of Chemical Engineering, Stanford University, 443 Via Ortega, Stanford, CA 94305, USA

<sup>‡</sup>SUNCAT Center for Interface Science and Catalysis, SLAC National Accelerator Laboratory, 2575 Sand Hill Road, Menlo Park, CA 94025, USA

<sup>†</sup>A.D. and D.R. have contributed equally.

\*Email: [biswarup@iiti.ac.in](mailto:biswarup@iiti.ac.in)

### Contents

|                                                                              |     |
|------------------------------------------------------------------------------|-----|
| A. Gaussian full references                                                  | S2  |
| B. DFT calculated descriptors for all the 44 catalysts                       | S3  |
| C. Optimized hyperparameters values                                          | S4  |
| D. Performance analysis of ML models                                         | S5  |
| E. Best fitted ML models for TS1, TS2 and TS3 and their performance analysis | S5  |
| F. Cross-Validation analysis for machine learning models                     | S6  |
| G. ML predicted descriptors values for all the 286 catalysts                 | S7  |
| H. DFT validation of ML predicted energies of all the descriptors            | S14 |
| I. Proposed best performing catalyst to produce HCOOH from CO <sub>2</sub> . | S14 |
| J. Natural bond orbital (NBO) analysis of catalysts                          | S15 |

## **A. Gaussian full references**

Gaussian 09, Revision D.01, M.J. Frisch, G.W. Trucks, H.B. Schlegel, G.E. Scuseria, M.A. Robb, J.R. Cheeseman, G. Scalmani, V. Barone, B. Mennucci, G.A. Petersson, H. Nakatsuji, M. Caricato, X. Li, H.P. Hratchian, A.F. Izmaylov, J. Bloino, G. Zheng, J.L. Sonnenberg, M. Hada, M. Ehara, K. Toyota, R. Fukuda, J. Hasegawa, M. Ishida, T. Nakajima, Y. Honda, O. Kitao, H. Nakai, T. Vreven, J.A. Montgomery, Jr., J.E. Peralta, F. Ogliaro, M. Bearpark, J.J. Heyd, E. Brothers, K.N. Kudin, V.N. Staroverov, T. Keith, R. Kobayashi, J. Normand, K. Raghavachari, A. Rendell, J.C. Burant, S.S. Iyengar, J. Tomasi, M. Cossi, N. Rega, J.M. Millam, M. Klene, J.E. Knox, J.B. Cross, V. Bakken, C. Adamo, J. Jaramillo, R. Gomperts, R.E. Stratmann, O. Yazyev, A.J. Austin, R. Cammi, C. Pomelli, J.W. Ochterski, R.L. Martin, K. Morokuma, V.G. Zakrzewski, G.A. Voth, P. Salvador, J.J. Dannenberg, S. Dapprich, A.D. Daniels, O. Farkas, J.B. Foresman, J.V. Ortiz, J. Cioslowski, D.J. Fox, Gaussian, Inc., Wallingford CT, 2013.

## B. DFT calculated descriptors for all the 44 catalysts.

Table S1. DFT calculated  $\Delta\Delta G^\ddagger$  and  $\Delta G^\ddagger$  values for all the 44 catalysts. All the values are in eV.

| SL No. | L <sub>1</sub>  | L <sub>2</sub>  | L <sub>3</sub>  | $\Delta\Delta G^{\ddagger RN}$ | $\Delta\Delta G^{\ddagger N}$ | $\Delta\Delta G^{\ddagger M}$ | $\Delta G^{\ddagger TS1}$ | $\Delta G^{\ddagger TS2}$ | $\Delta G^{\ddagger TS3}$ |
|--------|-----------------|-----------------|-----------------|--------------------------------|-------------------------------|-------------------------------|---------------------------|---------------------------|---------------------------|
| 1      | Me              | Me              | H               | 0.58                           | 1.70                          | 2.04                          | 0.35                      | 1.04                      | -0.01                     |
| 2      | Ph              | Ph              | H               | 0.65                           | 1.75                          | 2.08                          | 0.41                      | 1.05                      | -0.08                     |
| 3      | Ph              | H               | H               | 0.53                           | 1.86                          | 2.19                          | 0.18                      | 1.17                      | 0.07                      |
| 4      | Pr              | Me              | H               | 0.57                           | 1.71                          | 2.04                          | 0.36                      | 0.85                      | -0.09                     |
| 5      | <sup>t</sup> Bu | Et              | H               | 0.46                           | 1.60                          | 1.93                          | 0.24                      | 0.98                      | 0.06                      |
| 6      | <sup>i</sup> Pr | OMe             | H               | 0.82                           | 1.84                          | 2.26                          | 0.47                      | 1.04                      | -0.02                     |
| 7      | Et              | CF <sub>3</sub> | H               | 1.18                           | 1.72                          | 2.18                          | 0.29                      | 1.05                      | 0.66                      |
| 8      | H               | H               | Me              | 0.55                           | 1.79                          | 2.13                          | 0.24                      | 1.08                      | -0.02                     |
| 9      | H               | Pr              | Me              | 0.55                           | 1.76                          | 2.09                          | 0.27                      | 1.05                      | 0.17                      |
| 10     | H               | Et              | Me              | 0.56                           | 1.78                          | 2.11                          | 0.11                      | 1.07                      | 0.07                      |
| 11     | Me              | <sup>i</sup> Pr | Me              | 0.41                           | 1.70                          | 2.03                          | 0.20                      | 0.99                      | 0.01                      |
| 12     | <sup>i</sup> Pr | Et              | Me              | 0.40                           | 1.68                          | 2.01                          | 0.18                      | 0.96                      | -0.06                     |
| 13     | OEt             | Et              | Me              | 0.64                           | 1.94                          | 2.28                          | 0.41                      | 1.03                      | -0.07                     |
| 14     | OEt             | <sup>i</sup> Pr | Me              | 1.01                           | 1.97                          | 2.30                          | 0.15                      | 1.06                      | 0.00                      |
| 15     | CF <sub>3</sub> | <sup>i</sup> Pr | Me              | 0.70                           | 1.89                          | 2.23                          | 0.36                      | 1.20                      | 0.15                      |
| 16     | Ph              | Ph              | Et              | 0.52                           | 1.71                          | 2.05                          | 0.26                      | 1.03                      | -0.08                     |
| 17     | H               | <sup>t</sup> Bu | Et              | 0.75                           | 1.63                          | 1.97                          | 0.51                      | 0.91                      | -0.03                     |
| 18     | OMe             | Me              | Et              | 0.55                           | 1.83                          | 2.16                          | 0.22                      | 1.14                      | 0.05                      |
| 19     | Pr              | Et              | Et              | 0.47                           | 1.65                          | 1.98                          | 0.25                      | 0.96                      | 0.02                      |
| 20     | OMe             | Pr              | Et              | 0.63                           | 1.73                          | 2.15                          | 0.25                      | 0.92                      | 0.00                      |
| 21     | Ph              | CF <sub>3</sub> | Et              | 1.06                           | 1.77                          | 2.10                          | 0.43                      | 1.14                      | 0.54                      |
| 22     | CF <sub>3</sub> | Pr              | Et              | 0.98                           | 1.90                          | 2.24                          | 0.44                      | 1.21                      | 0.49                      |
| 23     | <sup>i</sup> Pr | H               | Pr              | 0.54                           | 1.77                          | 2.10                          | 0.33                      | 1.04                      | -0.04                     |
| 24     | OEt             | Me              | Pr              | 0.56                           | 1.83                          | 2.16                          | 0.25                      | 1.07                      | -0.03                     |
| 25     | Et              | Ph              | Pr              | 0.53                           | 1.64                          | 1.97                          | 0.30                      | 0.99                      | -0.10                     |
| 26     | OMe             | Et              | Pr              | 0.59                           | 1.86                          | 2.19                          | 0.29                      | 1.05                      | 0.01                      |
| 27     | OEt             | Pr              | Pr              | 0.72                           | 2.16                          | 2.14                          | 0.34                      | 0.97                      | -0.06                     |
| 28     | CF <sub>3</sub> | H               | Pr              | 0.93                           | 1.93                          | 2.26                          | 0.51                      | 1.16                      | 0.14                      |
| 29     | CF <sub>3</sub> | OEt             | Pr              | 0.80                           | 2.15                          | 2.49                          | 0.49                      | 1.23                      | 0.35                      |
| 30     | <sup>t</sup> Bu | <sup>t</sup> Bu | <sup>i</sup> Pr | 0.94                           | 1.43                          | 1.76                          | 0.68                      | 0.61                      | 0.35                      |
| 31     | <sup>i</sup> Pr | <sup>i</sup> Pr | <sup>i</sup> Pr | 0.69                           | 1.38                          | 1.71                          | 0.33                      | 0.70                      | 0.27                      |
| 32     | H               | OEt             | <sup>i</sup> Pr | 0.70                           | 1.99                          | 2.32                          | 0.46                      | 1.12                      | -0.02                     |
| 33     | Et              | Me              | <sup>i</sup> Pr | 0.50                           | 1.70                          | 2.03                          | 0.23                      | 1.00                      | 0.12                      |
| 34     | Ph              | <sup>i</sup> Pr | <sup>i</sup> Pr | 0.60                           | 1.54                          | 1.87                          | 0.29                      | 0.94                      | -0.05                     |
| 35     | <sup>t</sup> Bu | Pr              | <sup>i</sup> Pr | 0.65                           | 1.70                          | 2.03                          | 0.07                      | 1.01                      | 0.38                      |
| 36     | OMe             | OEt             | <sup>i</sup> Pr | 0.59                           | 1.79                          | 2.12                          | 0.32                      | 1.13                      | -0.01                     |
| 37     | CF <sub>3</sub> | H               | <sup>i</sup> Pr | 0.76                           | 2.06                          | 2.39                          | 0.30                      | 1.30                      | 0.13                      |
| 38     | OMe             | OMe             | <sup>t</sup> Bu | 0.72                           | 2.01                          | 2.34                          | 0.50                      | 1.20                      | 0.03                      |

|    |                 |                 |                 |      |      |      |      |      |       |
|----|-----------------|-----------------|-----------------|------|------|------|------|------|-------|
| 39 | Ph              | H               | <sup>t</sup> Bu | 0.56 | 1.89 | 2.22 | 0.33 | 1.22 | -0.01 |
| 40 | Me              | Ph              | <sup>t</sup> Bu | 0.43 | 1.68 | 2.01 | 0.20 | 1.02 | 0.02  |
| 41 | Ph              | Pr              | <sup>t</sup> Bu | 0.42 | 1.59 | 1.92 | 0.20 | 0.93 | -0.02 |
| 42 | <sup>t</sup> Bu | OMe             | <sup>t</sup> Bu | 0.72 | 1.92 | 2.17 | 0.47 | 1.03 | -0.03 |
| 43 | CF <sub>3</sub> | Me              | <sup>t</sup> Bu | 0.76 | 1.96 | 2.30 | 0.27 | 1.11 | 0.13  |
| 44 | OMe             | CF <sub>3</sub> | <sup>t</sup> Bu | 1.01 | 1.93 | 2.26 | 0.55 | 1.23 | 0.35  |

### C. Optimized hyperparameters values.

**Table S2.** Optimized values of the hyperparameters for the best fitted ML algorithms for all the considered descriptors.

| Descriptors                    | ML Models   | Optimized hyperparameters for best fitted models                                                              |
|--------------------------------|-------------|---------------------------------------------------------------------------------------------------------------|
| $\Delta\Delta G^{\ddagger RN}$ | <b>XGBR</b> | n_estimators: 100, min_child_weight: 3, max_depth: 5, learning_rate: 0.05, booster: gbtree, base_score: 0.5   |
| $\Delta\Delta G^{\ddagger N}$  | <b>GBR</b>  | n_estimators: 100, min_samples_split: 10, min_samples_leaf: 3, max_depth: 10, learning_rate: 0.2              |
| $\Delta\Delta G^{\ddagger M}$  | <b>XGBR</b> | n_estimators: 1500, min_child_weight: 4, learning_rate: 0.1, booster: gbtree, max_depth: 15, base_score: 1    |
| $\Delta G^{\ddagger TS1}$      | <b>XGBR</b> | n_estimators: 100, min_child_weight: 2, learning_rate: 0.05, booster: gbtree, max_depth: 15, base_score: 0.25 |
| $\Delta G^{\ddagger TS2}$      | <b>GBR</b>  | n_estimators: 100, min_samples_split: 10, min_samples_leaf: 3, max_depth: 10, learning_rate: 0.5              |
| $\Delta G^{\ddagger TS3}$      | <b>GBR</b>  | n_estimators: 900, min_samples_split: 5, min_samples_leaf: 5, max_depth: 3, learning_rate: 0.1                |

## D. Performance analysis of ML models

**Table S3.** Performance analysis (RMSE) of all the considered ML models for all the descriptors. All the values are in eV.

| Algorithm         | Error        | $\Delta\Delta G^{\ddagger RN}$ | $\Delta\Delta G^{\ddagger N}$ | $\Delta\Delta G^{\ddagger M}$ | $\Delta G^{\ddagger TS1}$ | $\Delta G^{\ddagger TS2}$ | $\Delta G^{\ddagger TS3}$ |
|-------------------|--------------|--------------------------------|-------------------------------|-------------------------------|---------------------------|---------------------------|---------------------------|
| Linear Regression | Train (RMSE) | 0.08                           | 0.09                          | 0.07                          | 0.09                      | 0.06                      | 0.10                      |
|                   | Test (RMSE)  | 0.21                           | 0.11                          | 0.13                          | 0.10                      | 0.12                      | 0.16                      |
| KRR               | Train (RMSE) | 0.12                           | 0.09                          | 0.07                          | 0.09                      | 0.01                      | 0.11                      |
|                   | Test (RMSE)  | 0.15                           | 0.10                          | 0.13                          | 0.09                      | 0.11                      | 0.10                      |
| RFR               | Train (RMSE) | 0.14                           | 0.09                          | 0.07                          | 0.11                      | 0.07                      | 0.13                      |
|                   | Test (RMSE)  | 0.13                           | 0.13                          | 0.13                          | 0.10                      | 0.11                      | 0.08                      |
| GBR               | Train (RMSE) | 0.11                           | 0.01                          | $0.13 \times 10^{-4}$         | 0.07                      | 0.01                      | 0.01                      |
|                   | Test (RMSE)  | 0.15                           | 0.09                          | 0.12                          | 0.08                      | 0.10                      | 0.08                      |
| XGBR              | Train (RMSE) | 0.08                           | $0.87 \times 10^{-4}$         | 0.03                          | 0.04                      | 0.02                      | 0.09                      |
|                   | Test (RMSE)  | 0.14                           | 0.10                          | 0.12                          | 0.07                      | 0.11                      | 0.09                      |

## E. Best fitted ML models for TS1, TS2 and TS3 and their performance analysis.

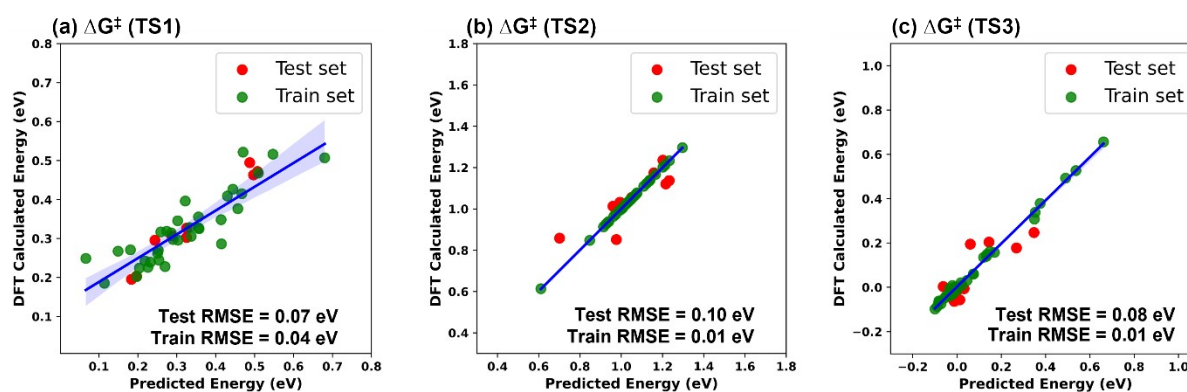

**Fig. S1** Plot of DFT calculated vs ML predicted activation barriers of the transition states: (a) TS1, (b) TS2 and (c) TS3. All the energy values are in eV.

## F. Cross-Validation (CV) analysis for best fitted machine learning models.

An evaluation method called Cross-Validation is used in machine learning to determine whether the model is stable and efficient enough when trained on the subset of input data sets and tested on the unseen set of datasets. Here, we used the k-fold cross validation method. The data sample is split into ‘k’ number of smaller samples, and in our case, k is 5 and the data sets is split into 5-fold (CV<sub>i</sub>, i = 1, 2, 3, 4 and 5) sub-datasets (train and test). First, for example, CV2-5 subsets are considered for training, and the CV1 subset is left for the validation of the trained model. This process is repeated four more times with different subsets for the validation of the trained model. Cross-validation reduces the chances of overfitting and increases the generalizability of the parameters used in the machine learning model. Fig. S2 shows the concept of a 5-fold cross-validation loop. The root-mean-square error (RMSE) of each iteration and the mean of the RMSE for the total 5 iterations are computed.

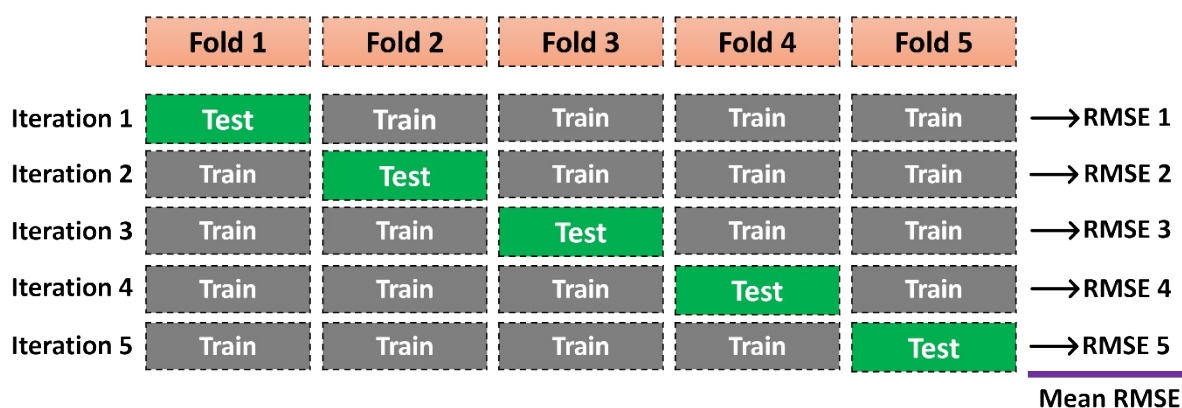

**Fig. S2** The scheme explaining of k-fold (k = 5) Cross-Validation (CV) method.

**Table S4.** Root-Mean-Square Error (RMSE) Score for each fold (CV<sub>i</sub>) of the 5-Fold CV using best fitted ML models for descriptors. Here, Avg. is the Mean RMSE of all the CV. All the values are in eV.

| Data sets                            | Method      | CV1  | CV2  | CV3  | CV4  | CV5  | Avg. |
|--------------------------------------|-------------|------|------|------|------|------|------|
| $\Delta\Delta G^{\ddagger\text{RN}}$ | <b>XGBR</b> | 0.14 | 0.17 | 0.21 | 0.15 | 0.11 | 0.16 |
| $\Delta\Delta G^{\ddagger\text{N}}$  | <b>GBR</b>  | 0.10 | 0.17 | 0.10 | 0.11 | 0.13 | 0.12 |
| $\Delta\Delta G^{\ddagger\text{M}}$  | <b>XGBR</b> | 0.15 | 0.10 | 0.16 | 0.12 | 0.12 | 0.13 |
| $\Delta G^{\ddagger\text{TS1}}$      | <b>XGBR</b> | 0.10 | 0.17 | 0.12 | 0.10 | 0.11 | 0.12 |

|                           |            |      |      |      |      |      |      |
|---------------------------|------------|------|------|------|------|------|------|
| $\Delta G^{\ddagger TS2}$ | <b>GBR</b> | 0.09 | 0.13 | 0.11 | 0.08 | 0.13 | 0.11 |
| $\Delta G^{\ddagger TS3}$ | <b>GBR</b> | 0.15 | 0.10 | 0.09 | 0.11 | 0.15 | 0.12 |

### G. ML predicted descriptors values for all the 286 catalysts

**Table S5.** ML predicted  $\Delta\Delta G^{\ddagger}$  and  $\Delta G^{\ddagger}$  values for all the 286 catalysts. All the values are in eV.

| SL No. | L1              | L2              | L3 | $\Delta\Delta G^{\ddagger RN}$ | $\Delta\Delta G^{\ddagger N}$ | $\Delta\Delta G^{\ddagger M}$ | $\Delta G^{\ddagger TS1}$ | $\Delta G^{\ddagger TS2}$ | $\Delta G^{\ddagger TS3}$ |
|--------|-----------------|-----------------|----|--------------------------------|-------------------------------|-------------------------------|---------------------------|---------------------------|---------------------------|
| 45     | H               | H               | H  | 0.68                           | 1.82                          | 2.16                          | 0.35                      | 1.13                      | 0.10                      |
| 46     | Et              | Et              | H  | 0.57                           | 1.65                          | 2.01                          | 0.26                      | 1.01                      | 0.07                      |
| 47     | <sup>t</sup> Bu | <sup>t</sup> Bu | H  | 0.75                           | 1.66                          | 1.97                          | 0.50                      | 0.93                      | 0.05                      |
| 48     | Pr              | Pr              | H  | 0.67                           | 1.66                          | 2.04                          | 0.28                      | 0.92                      | 0.02                      |
| 49     | <sup>i</sup> Pr | <sup>i</sup> Pr | H  | 0.74                           | 1.68                          | 2.01                          | 0.40                      | 0.99                      | 0.02                      |
| 50     | OMe             | OMe             | H  | 0.75                           | 1.89                          | 2.28                          | 0.46                      | 1.11                      | 0.03                      |
| 51     | OEt             | OEt             | H  | 0.78                           | 1.97                          | 2.29                          | 0.48                      | 1.09                      | -0.02                     |
| 52     | Me              | H               | H  | 0.57                           | 1.80                          | 2.12                          | 0.28                      | 1.11                      | 0.00                      |
| 53     | Et              | H               | H  | 0.56                           | 1.81                          | 2.13                          | 0.22                      | 1.11                      | 0.13                      |
| 54     | <sup>t</sup> Bu | H               | H  | 0.68                           | 1.73                          | 2.06                          | 0.48                      | 0.99                      | 0.08                      |
| 55     | <sup>i</sup> Pr | H               | H  | 0.67                           | 1.78                          | 2.15                          | 0.33                      | 1.08                      | 0.06                      |
| 56     | Pr              | H               | H  | 0.63                           | 1.78                          | 2.12                          | 0.25                      | 1.04                      | 0.10                      |
| 57     | OMe             | H               | H  | 0.68                           | 1.89                          | 2.25                          | 0.38                      | 1.13                      | 0.07                      |
| 58     | OEt             | H               | H  | 0.71                           | 2.02                          | 2.31                          | 0.38                      | 1.14                      | 0.02                      |
| 59     | Ph              | Me              | H  | 0.54                           | 1.71                          | 2.00                          | 0.33                      | 1.04                      | -0.07                     |
| 60     | Et              | Me              | H  | 0.53                           | 1.66                          | 2.04                          | 0.26                      | 1.00                      | -0.03                     |
| 61     | <sup>t</sup> Bu | Me              | H  | 0.56                           | 1.64                          | 1.94                          | 0.37                      | 0.91                      | -0.03                     |
| 62     | <sup>i</sup> Pr | Me              | H  | 0.56                           | 1.70                          | 2.00                          | 0.33                      | 0.97                      | -0.03                     |
| 63     | OMe             | Me              | H  | 0.57                           | 1.86                          | 2.19                          | 0.35                      | 1.12                      | -0.02                     |
| 64     | OEt             | Me              | H  | 0.58                           | 1.88                          | 2.22                          | 0.36                      | 1.08                      | -0.07                     |
| 65     | Et              | Ph              | H  | 0.57                           | 1.69                          | 2.02                          | 0.28                      | 1.01                      | -0.06                     |
| 66     | <sup>t</sup> Bu | Ph              | H  | 0.63                           | 1.68                          | 1.98                          | 0.40                      | 0.96                      | -0.05                     |
| 67     | <sup>i</sup> Pr | Ph              | H  | 0.63                           | 1.71                          | 2.03                          | 0.31                      | 1.01                      | -0.15                     |
| 68     | Pr              | Ph              | H  | 0.55                           | 1.61                          | 1.96                          | 0.26                      | 0.94                      | -0.08                     |
| 69     | OMe             | Ph              | H  | 0.63                           | 1.89                          | 2.23                          | 0.37                      | 1.12                      | -0.08                     |
| 70     | OEt             | Ph              | H  | 0.68                           | 1.98                          | 2.26                          | 0.38                      | 1.09                      | -0.15                     |
| 71     | <sup>i</sup> Pr | Et              | H  | 0.56                           | 1.66                          | 1.99                          | 0.25                      | 0.97                      | 0.00                      |
| 72     | Pr              | Et              | H  | 0.53                           | 1.61                          | 2.02                          | 0.25                      | 0.94                      | 0.03                      |
| 73     | OMe             | Et              | H  | 0.57                           | 1.87                          | 2.23                          | 0.25                      | 1.06                      | 0.04                      |
| 74     | OEt             | Et              | H  | 0.64                           | 1.96                          | 2.27                          | 0.33                      | 1.05                      | -0.01                     |
| 75     | <sup>i</sup> Pr | <sup>t</sup> Bu | H  | 0.75                           | 1.66                          | 1.95                          | 0.49                      | 0.94                      | 0.05                      |
| 76     | Pr              | <sup>t</sup> Bu | H  | 0.67                           | 1.66                          | 2.03                          | 0.25                      | 0.89                      | 0.03                      |
| 77     | OMe             | <sup>t</sup> Bu | H  | 0.75                           | 1.83                          | 2.16                          | 0.49                      | 0.96                      | 0.01                      |

|     |                 |                 |    |      |      |      |      |      |       |
|-----|-----------------|-----------------|----|------|------|------|------|------|-------|
| 78  | OEt             | <sup>t</sup> Bu | H  | 0.79 | 1.94 | 2.20 | 0.50 | 0.97 | 0.00  |
| 79  | Pr              | <sup>i</sup> Pr | H  | 0.67 | 1.68 | 2.01 | 0.27 | 0.92 | -0.02 |
| 80  | OEt             | <sup>i</sup> Pr | H  | 0.79 | 1.97 | 2.28 | 0.40 | 1.05 | 0.02  |
| 81  | OMe             | Pr              | H  | 0.68 | 1.80 | 2.20 | 0.28 | 0.99 | -0.02 |
| 82  | OEt             | Pr              | H  | 0.70 | 2.04 | 2.21 | 0.30 | 0.98 | -0.06 |
| 83  | OEt             | OMe             | H  | 0.76 | 1.96 | 2.30 | 0.48 | 1.12 | -0.05 |
| 84  | CF <sub>3</sub> | CF <sub>3</sub> | H  | 0.96 | 1.82 | 2.23 | 0.48 | 1.15 | 0.56  |
| 85  | CF <sub>3</sub> | H               | H  | 0.91 | 1.90 | 2.25 | 0.43 | 1.19 | 0.41  |
| 86  | CF <sub>3</sub> | Me              | H  | 0.80 | 1.92 | 2.29 | 0.38 | 1.13 | 0.37  |
| 87  | CF <sub>3</sub> | Ph              | H  | 0.96 | 1.78 | 2.15 | 0.43 | 1.14 | 0.57  |
| 88  | CF <sub>3</sub> | <sup>t</sup> Bu | H  | 0.96 | 1.81 | 2.17 | 0.50 | 1.14 | 0.49  |
| 89  | CF <sub>3</sub> | <sup>i</sup> Pr | H  | 0.96 | 1.85 | 2.20 | 0.46 | 1.15 | 0.43  |
| 90  | CF <sub>3</sub> | Pr              | H  | 0.91 | 1.87 | 2.29 | 0.34 | 1.15 | 0.50  |
| 91  | CF <sub>3</sub> | OMe             | H  | 0.95 | 1.85 | 2.23 | 0.47 | 1.18 | 0.54  |
| 92  | CF <sub>3</sub> | OEt             | H  | 0.97 | 2.03 | 2.44 | 0.50 | 1.18 | 0.54  |
| 93  | Me              | Me              | Me | 0.49 | 1.68 | 2.04 | 0.22 | 1.03 | 0.00  |
| 94  | Ph              | Ph              | Me | 0.57 | 1.70 | 2.07 | 0.32 | 1.05 | -0.10 |
| 95  | Et              | Et              | Me | 0.52 | 1.66 | 2.01 | 0.27 | 1.00 | 0.01  |
| 96  | <sup>t</sup> Bu | <sup>t</sup> Bu | Me | 0.72 | 1.65 | 1.95 | 0.36 | 0.93 | 0.01  |
| 97  | Pr              | Pr              | Me | 0.59 | 1.68 | 2.03 | 0.22 | 0.93 | 0.09  |
| 98  | <sup>i</sup> Pr | <sup>i</sup> Pr | Me | 0.59 | 1.70 | 2.02 | 0.18 | 0.99 | -0.02 |
| 99  | OMe             | OMe             | Me | 0.67 | 1.91 | 2.27 | 0.28 | 1.11 | -0.01 |
| 100 | OEt             | OEt             | Me | 0.79 | 1.96 | 2.29 | 0.34 | 1.09 | -0.06 |
| 101 | Me              | H               | Me | 0.49 | 1.76 | 2.10 | 0.20 | 1.08 | -0.01 |
| 102 | Ph              | H               | Me | 0.53 | 1.82 | 2.17 | 0.16 | 1.11 | -0.04 |
| 103 | <sup>t</sup> Bu | H               | Me | 0.64 | 1.70 | 2.02 | 0.32 | 0.95 | 0.00  |
| 104 | <sup>i</sup> Pr | H               | Me | 0.52 | 1.78 | 2.14 | 0.15 | 1.04 | -0.01 |
| 105 | OMe             | H               | Me | 0.60 | 1.88 | 2.23 | 0.22 | 1.10 | 0.00  |
| 106 | OEt             | H               | Me | 0.72 | 2.00 | 2.29 | 0.21 | 1.10 | -0.05 |
| 107 | Ph              | Me              | Me | 0.49 | 1.67 | 2.01 | 0.22 | 1.04 | -0.04 |
| 108 | Et              | Me              | Me | 0.49 | 1.67 | 2.06 | 0.21 | 1.01 | -0.01 |
| 109 | <sup>t</sup> Bu | Me              | Me | 0.53 | 1.62 | 1.93 | 0.25 | 0.92 | 0.00  |
| 110 | Pr              | Me              | Me | 0.48 | 1.73 | 2.04 | 0.22 | 0.91 | 0.06  |
| 111 | OMe             | Me              | Me | 0.50 | 1.87 | 2.20 | 0.22 | 1.13 | 0.02  |
| 112 | OEt             | Me              | Me | 0.59 | 1.87 | 2.23 | 0.24 | 1.08 | -0.04 |
| 113 | Et              | Ph              | Me | 0.51 | 1.67 | 2.02 | 0.28 | 1.00 | -0.12 |
| 114 | <sup>t</sup> Bu | Ph              | Me | 0.62 | 1.64 | 1.97 | 0.36 | 0.95 | -0.10 |
| 115 | <sup>i</sup> Pr | Ph              | Me | 0.50 | 1.71 | 2.05 | 0.18 | 1.01 | -0.20 |
| 116 | Pr              | Ph              | Me | 0.50 | 1.60 | 1.94 | 0.22 | 0.95 | -0.02 |
| 117 | OMe             | Ph              | Me | 0.58 | 1.89 | 2.23 | 0.28 | 1.12 | -0.12 |
| 118 | OEt             | Ph              | Me | 0.69 | 1.97 | 2.27 | 0.34 | 1.09 | -0.19 |
| 119 | <sup>t</sup> Bu | Et              | Me | 0.57 | 1.60 | 1.92 | 0.26 | 0.92 | 0.01  |
| 120 | Pr              | Et              | Me | 0.48 | 1.64 | 2.02 | 0.22 | 0.95 | 0.09  |
| 121 | OMe             | Et              | Me | 0.53 | 1.89 | 2.22 | 0.22 | 1.07 | -0.01 |
| 122 | <sup>i</sup> Pr | <sup>t</sup> Bu | Me | 0.72 | 1.67 | 1.96 | 0.28 | 0.94 | 0.02  |
| 123 | Pr              | <sup>t</sup> Bu | Me | 0.64 | 1.68 | 2.01 | 0.19 | 0.91 | 0.10  |



|     |                 |                 |    |      |      |      |      |      |       |
|-----|-----------------|-----------------|----|------|------|------|------|------|-------|
| 124 | OMe             | <sup>t</sup> Bu | Me | 0.71 | 1.85 | 2.15 | 0.32 | 0.97 | -0.04 |
| 125 | OEt             | <sup>t</sup> Bu | Me | 0.80 | 1.93 | 2.19 | 0.37 | 0.97 | -0.04 |
| 126 | Pr              | <sup>i</sup> Pr | Me | 0.52 | 1.71 | 2.04 | 0.19 | 0.93 | 0.06  |
| 127 | OMe             | <sup>i</sup> Pr | Me | 0.61 | 1.86 | 2.26 | 0.22 | 1.05 | -0.05 |
| 128 | OMe             | Pr              | Me | 0.60 | 1.83 | 2.19 | 0.22 | 0.99 | 0.06  |
| 129 | OEt             | Pr              | Me | 0.70 | 2.06 | 2.22 | 0.25 | 0.99 | 0.02  |
| 130 | OEt             | OMe             | Me | 0.77 | 1.95 | 2.29 | 0.31 | 1.13 | -0.08 |
| 131 | CF <sub>3</sub> | CF <sub>3</sub> | Me | 0.93 | 1.85 | 2.23 | 0.41 | 1.17 | 0.29  |
| 132 | CF <sub>3</sub> | H               | Me | 0.88 | 1.90 | 2.26 | 0.32 | 1.16 | 0.15  |
| 133 | CF <sub>3</sub> | Me              | Me | 0.78 | 1.95 | 2.29 | 0.30 | 1.16 | 0.13  |
| 134 | CF <sub>3</sub> | Ph              | Me | 0.93 | 1.78 | 2.15 | 0.42 | 1.16 | 0.31  |
| 135 | CF <sub>3</sub> | <sup>t</sup> Bu | Me | 0.97 | 1.84 | 2.15 | 0.44 | 1.17 | 0.23  |
| 136 | CF <sub>3</sub> | Et              | Me | 0.93 | 1.77 | 2.19 | 0.31 | 1.14 | 0.37  |
| 137 | CF <sub>3</sub> | Pr              | Me | 0.89 | 1.91 | 2.29 | 0.30 | 1.18 | 0.37  |
| 138 | CF <sub>3</sub> | OMe             | Me | 0.94 | 1.88 | 2.25 | 0.36 | 1.19 | 0.28  |
| 139 | CF <sub>3</sub> | OEt             | Me | 0.97 | 2.05 | 2.46 | 0.42 | 1.20 | 0.29  |
| 140 | H               | H               | Et | 0.64 | 1.73 | 2.08 | 0.35 | 1.08 | -0.01 |
| 141 | Me              | Me              | Et | 0.53 | 1.67 | 2.00 | 0.23 | 1.02 | 0.02  |
| 142 | Et              | Et              | Et | 0.53 | 1.67 | 1.98 | 0.23 | 0.99 | 0.02  |
| 143 | <sup>t</sup> Bu | <sup>t</sup> Bu | Et | 0.75 | 1.63 | 1.91 | 0.48 | 0.91 | 0.03  |
| 144 | Pr              | Pr              | Et | 0.64 | 1.66 | 1.98 | 0.30 | 0.93 | 0.04  |
| 145 | <sup>i</sup> Pr | <sup>i</sup> Pr | Et | 0.63 | 1.69 | 1.95 | 0.34 | 0.97 | 0.01  |
| 146 | OMe             | OMe             | Et | 0.71 | 1.82 | 2.21 | 0.37 | 1.11 | 0.02  |
| 147 | OEt             | OEt             | Et | 0.77 | 1.94 | 2.24 | 0.41 | 1.07 | -0.04 |
| 148 | Me              | H               | Et | 0.54 | 1.73 | 2.06 | 0.21 | 1.09 | -0.04 |
| 149 | Ph              | H               | Et | 0.55 | 1.78 | 2.12 | 0.22 | 1.11 | -0.06 |
| 150 | Et              | H               | Et | 0.52 | 1.75 | 2.07 | 0.22 | 1.08 | 0.01  |
| 151 | <sup>i</sup> Pr | H               | Et | 0.57 | 1.74 | 2.07 | 0.32 | 1.04 | -0.03 |
| 152 | Pr              | H               | Et | 0.62 | 1.71 | 2.05 | 0.30 | 1.03 | 0.07  |
| 153 | OMe             | H               | Et | 0.65 | 1.81 | 2.17 | 0.36 | 1.12 | -0.03 |
| 154 | OEt             | H               | Et | 0.72 | 1.97 | 2.23 | 0.37 | 1.10 | -0.09 |
| 155 | Ph              | Me              | Et | 0.51 | 1.66 | 2.00 | 0.22 | 1.03 | -0.02 |
| 156 | Et              | Me              | Et | 0.50 | 1.66 | 2.02 | 0.23 | 1.00 | -0.01 |
| 157 | <sup>t</sup> Bu | Me              | Et | 0.58 | 1.60 | 1.90 | 0.30 | 0.91 | 0.02  |
| 158 | Pr              | Me              | Et | 0.54 | 1.70 | 2.00 | 0.25 | 0.91 | 0.01  |
| 159 | <sup>i</sup> Pr | Me              | Et | 0.46 | 1.69 | 1.98 | 0.24 | 0.97 | 0.04  |
| 160 | OEt             | Me              | Et | 0.59 | 1.89 | 2.19 | 0.26 | 1.07 | -0.02 |
| 161 | Et              | Ph              | Et | 0.53 | 1.68 | 2.01 | 0.24 | 1.00 | -0.11 |
| 162 | <sup>t</sup> Bu | Ph              | Et | 0.63 | 1.63 | 1.93 | 0.38 | 0.93 | -0.07 |
| 163 | <sup>i</sup> Pr | Ph              | Et | 0.51 | 1.71 | 2.00 | 0.26 | 0.99 | -0.16 |
| 164 | Pr              | Ph              | Et | 0.52 | 1.59 | 1.92 | 0.28 | 0.95 | -0.07 |
| 165 | OMe             | Ph              | Et | 0.59 | 1.81 | 2.19 | 0.27 | 1.12 | -0.09 |
| 166 | OEt             | Ph              | Et | 0.67 | 1.97 | 2.22 | 0.31 | 1.07 | -0.17 |
| 167 | <sup>t</sup> Bu | Et              | Et | 0.58 | 1.60 | 1.90 | 0.28 | 0.92 | 0.01  |
| 168 | <sup>i</sup> Pr | Et              | Et | 0.45 | 1.68 | 1.95 | 0.25 | 0.96 | -0.04 |
| 169 | OMe             | Et              | Et | 0.54 | 1.82 | 2.18 | 0.23 | 1.06 | 0.00  |

|     |                 |                 |    |      |      |      |      |      |       |
|-----|-----------------|-----------------|----|------|------|------|------|------|-------|
| 170 | OEt             | Et              | Et | 0.64 | 1.94 | 2.23 | 0.29 | 1.04 | -0.06 |
| 171 | <sup>i</sup> Pr | <sup>t</sup> Bu | Et | 0.75 | 1.66 | 1.90 | 0.47 | 0.91 | 0.05  |
| 172 | Pr              | <sup>t</sup> Bu | Et | 0.69 | 1.65 | 1.98 | 0.29 | 0.90 | 0.05  |
| 173 | OMe             | <sup>t</sup> Bu | Et | 0.75 | 1.76 | 2.09 | 0.47 | 0.96 | -0.01 |
| 174 | OEt             | <sup>t</sup> Bu | Et | 0.79 | 1.91 | 2.15 | 0.50 | 0.95 | -0.02 |
| 175 | Pr              | <sup>i</sup> Pr | Et | 0.57 | 1.70 | 1.97 | 0.30 | 0.92 | 0.01  |
| 176 | OMe             | <sup>i</sup> Pr | Et | 0.64 | 1.79 | 2.19 | 0.36 | 1.05 | -0.02 |
| 177 | OEt             | <sup>i</sup> Pr | Et | 0.78 | 1.94 | 2.22 | 0.35 | 1.03 | 0.01  |
| 178 | OEt             | Pr              | Et | 0.70 | 2.01 | 2.17 | 0.32 | 0.98 | -0.04 |
| 179 | OEt             | OMe             | Et | 0.75 | 1.93 | 2.23 | 0.41 | 1.12 | -0.06 |
| 180 | CF <sub>3</sub> | CF <sub>3</sub> | Et | 0.93 | 1.84 | 2.18 | 0.47 | 1.15 | 0.49  |
| 181 | CF <sub>3</sub> | H               | Et | 0.89 | 1.89 | 2.20 | 0.44 | 1.17 | 0.30  |
| 182 | CF <sub>3</sub> | Me              | Et | 0.78 | 1.94 | 2.24 | 0.32 | 1.15 | 0.32  |
| 183 | CF <sub>3</sub> | <sup>t</sup> Bu | Et | 0.97 | 1.83 | 2.10 | 0.51 | 1.15 | 0.43  |
| 184 | CF <sub>3</sub> | Et              | Et | 0.93 | 1.78 | 2.14 | 0.30 | 1.14 | 0.52  |
| 185 | CF <sub>3</sub> | <sup>i</sup> Pr | Et | 0.85 | 1.88 | 2.16 | 0.45 | 1.15 | 0.36  |
| 186 | CF <sub>3</sub> | OMe             | Et | 0.94 | 1.86 | 2.18 | 0.47 | 1.19 | 0.48  |
| 187 | CF <sub>3</sub> | OEt             | Et | 0.98 | 2.04 | 2.40 | 0.49 | 1.18 | 0.48  |
| 188 | H               | H               | Pr | 0.63 | 1.76 | 2.09 | 0.38 | 1.11 | -0.01 |
| 189 | Me              | Me              | Pr | 0.53 | 1.64 | 2.00 | 0.24 | 1.02 | 0.02  |
| 190 | Ph              | Ph              | Pr | 0.57 | 1.68 | 2.03 | 0.33 | 1.04 | -0.08 |
| 191 | Et              | Et              | Pr | 0.51 | 1.69 | 1.97 | 0.28 | 0.99 | 0.02  |
| 192 | <sup>t</sup> Bu | <sup>t</sup> Bu | Pr | 0.75 | 1.66 | 1.93 | 0.48 | 0.92 | 0.02  |
| 193 | Pr              | Pr              | Pr | 0.64 | 1.76 | 1.97 | 0.27 | 0.92 | 0.03  |
| 194 | <sup>i</sup> Pr | <sup>i</sup> Pr | Pr | 0.62 | 1.69 | 1.97 | 0.36 | 0.98 | -0.01 |
| 195 | OMe             | OMe             | Pr | 0.70 | 1.87 | 2.24 | 0.41 | 1.11 | 0.02  |
| 196 | OEt             | OEt             | Pr | 0.75 | 1.97 | 2.23 | 0.43 | 1.09 | -0.05 |
| 197 | Me              | H               | Pr | 0.54 | 1.72 | 2.06 | 0.24 | 1.10 | -0.03 |
| 198 | Ph              | H               | Pr | 0.54 | 1.79 | 2.12 | 0.25 | 1.13 | -0.06 |
| 199 | Et              | H               | Pr | 0.51 | 1.77 | 2.07 | 0.28 | 1.09 | 0.01  |
| 200 | <sup>t</sup> Bu | H               | Pr | 0.69 | 1.71 | 2.01 | 0.47 | 0.97 | -0.03 |
| 201 | Pr              | H               | Pr | 0.60 | 1.81 | 2.04 | 0.25 | 1.04 | 0.07  |
| 202 | OMe             | H               | Pr | 0.65 | 1.85 | 2.19 | 0.40 | 1.13 | -0.01 |
| 203 | OEt             | H               | Pr | 0.69 | 1.99 | 2.23 | 0.39 | 1.13 | -0.09 |
| 204 | Ph              | Me              | Pr | 0.51 | 1.64 | 1.97 | 0.23 | 1.04 | -0.01 |
| 205 | Et              | Me              | Pr | 0.50 | 1.63 | 2.01 | 0.26 | 1.00 | 0.01  |
| 206 | <sup>t</sup> Bu | Me              | Pr | 0.58 | 1.60 | 1.91 | 0.29 | 0.91 | 0.02  |
| 207 | Pr              | Me              | Pr | 0.53 | 1.74 | 1.99 | 0.25 | 0.91 | 0.01  |
| 208 | <sup>i</sup> Pr | Me              | Pr | 0.46 | 1.67 | 1.98 | 0.25 | 0.97 | 0.03  |
| 209 | OMe             | Me              | Pr | 0.54 | 1.82 | 2.16 | 0.24 | 1.12 | 0.04  |
| 210 | <sup>t</sup> Bu | Ph              | Pr | 0.62 | 1.64 | 1.94 | 0.39 | 0.95 | -0.08 |
| 211 | <sup>i</sup> Pr | Ph              | Pr | 0.50 | 1.70 | 2.00 | 0.28 | 1.00 | -0.17 |
| 212 | Pr              | Ph              | Pr | 0.52 | 1.69 | 1.90 | 0.24 | 0.95 | -0.07 |
| 213 | OMe             | Ph              | Pr | 0.59 | 1.86 | 2.19 | 0.33 | 1.12 | -0.08 |
| 214 | OEt             | Ph              | Pr | 0.64 | 1.96 | 2.21 | 0.35 | 1.09 | -0.17 |
| 215 | <sup>t</sup> Bu | Et              | Pr | 0.56 | 1.62 | 1.90 | 0.29 | 0.91 | 0.02  |

|     |                 |                 |                 |      |      |      |      |      |       |
|-----|-----------------|-----------------|-----------------|------|------|------|------|------|-------|
| 216 | <sup>i</sup> Pr | Et              | Pr              | 0.44 | 1.68 | 1.95 | 0.27 | 0.96 | -0.04 |
| 217 | Pr              | Et              | Pr              | 0.50 | 1.72 | 1.97 | 0.27 | 0.95 | 0.03  |
| 218 | OEt             | Et              | Pr              | 0.60 | 1.97 | 2.21 | 0.32 | 1.04 | -0.06 |
| 219 | <sup>i</sup> Pr | <sup>t</sup> Bu | Pr              | 0.74 | 1.68 | 1.92 | 0.46 | 0.93 | 0.03  |
| 220 | Pr              | <sup>t</sup> Bu | Pr              | 0.69 | 1.75 | 1.96 | 0.24 | 0.90 | 0.04  |
| 221 | OMe             | <sup>t</sup> Bu | Pr              | 0.75 | 1.85 | 2.13 | 0.47 | 0.96 | -0.01 |
| 222 | OEt             | <sup>t</sup> Bu | Pr              | 0.77 | 1.96 | 2.15 | 0.49 | 0.96 | -0.03 |
| 223 | Pr              | <sup>i</sup> Pr | Pr              | 0.56 | 1.77 | 1.97 | 0.26 | 0.92 | 0.00  |
| 224 | OMe             | <sup>i</sup> Pr | Pr              | 0.64 | 1.84 | 2.21 | 0.40 | 1.05 | -0.02 |
| 225 | OEt             | <sup>i</sup> Pr | Pr              | 0.75 | 1.97 | 2.22 | 0.37 | 1.05 | -0.01 |
| 226 | OMe             | Pr              | Pr              | 0.65 | 1.90 | 2.14 | 0.27 | 0.99 | 0.01  |
| 227 | OEt             | OMe             | Pr              | 0.74 | 1.94 | 2.25 | 0.44 | 1.12 | -0.06 |
| 228 | CF <sub>3</sub> | CF <sub>3</sub> | Pr              | 0.89 | 1.94 | 2.26 | 0.48 | 1.16 | 0.35  |
| 229 | CF <sub>3</sub> | Me              | Pr              | 0.78 | 1.95 | 2.30 | 0.32 | 1.15 | 0.20  |
| 230 | CF <sub>3</sub> | Ph              | Pr              | 0.89 | 1.86 | 2.17 | 0.43 | 1.16 | 0.37  |
| 231 | CF <sub>3</sub> | <sup>t</sup> Bu | Pr              | 0.93 | 1.93 | 2.18 | 0.51 | 1.16 | 0.28  |
| 232 | CF <sub>3</sub> | Et              | Pr              | 0.89 | 1.87 | 2.22 | 0.32 | 1.13 | 0.43  |
| 233 | CF <sub>3</sub> | <sup>i</sup> Pr | Pr              | 0.81 | 1.96 | 2.23 | 0.46 | 1.17 | 0.22  |
| 234 | CF <sub>3</sub> | Pr              | Pr              | 0.89 | 1.98 | 2.29 | 0.34 | 1.17 | 0.35  |
| 235 | CF <sub>3</sub> | OMe             | Pr              | 0.90 | 1.96 | 2.27 | 0.47 | 1.19 | 0.35  |
| 236 | H               | H               | <sup>i</sup> Pr | 0.62 | 1.68 | 2.13 | 0.34 | 1.10 | 0.11  |
| 237 | Me              | Me              | <sup>i</sup> Pr | 0.51 | 1.59 | 1.97 | 0.21 | 0.89 | 0.17  |
| 238 | Ph              | Ph              | <sup>i</sup> Pr | 0.56 | 1.56 | 1.98 | 0.28 | 0.92 | 0.01  |
| 239 | Et              | Et              | <sup>i</sup> Pr | 0.51 | 1.58 | 1.91 | 0.26 | 0.92 | 0.19  |
| 240 | Pr              | Pr              | <sup>i</sup> Pr | 0.62 | 1.69 | 2.04 | 0.21 | 0.87 | 0.25  |
| 241 | OMe             | OMe             | <sup>i</sup> Pr | 0.68 | 1.50 | 2.01 | 0.30 | 1.06 | 0.12  |
| 242 | OEt             | OEt             | <sup>i</sup> Pr | 0.73 | 1.83 | 2.16 | 0.40 | 0.92 | 0.09  |
| 243 | Me              | H               | <sup>i</sup> Pr | 0.51 | 1.68 | 2.16 | 0.23 | 1.10 | 0.04  |
| 244 | Ph              | H               | <sup>i</sup> Pr | 0.52 | 1.72 | 2.17 | 0.24 | 1.14 | -0.03 |
| 245 | Et              | H               | <sup>i</sup> Pr | 0.50 | 1.76 | 2.15 | 0.25 | 1.13 | 0.11  |
| 246 | <sup>t</sup> Bu | H               | <sup>i</sup> Pr | 0.71 | 1.60 | 2.03 | 0.49 | 0.94 | 0.23  |
| 247 | <sup>i</sup> Pr | H               | <sup>i</sup> Pr | 0.61 | 1.61 | 2.03 | 0.34 | 1.04 | 0.13  |
| 248 | Pr              | H               | <sup>i</sup> Pr | 0.58 | 1.76 | 2.17 | 0.22 | 1.05 | 0.21  |
| 249 | OMe             | H               | <sup>i</sup> Pr | 0.61 | 1.63 | 2.14 | 0.34 | 1.12 | 0.02  |
| 250 | Ph              | Me              | <sup>i</sup> Pr | 0.48 | 1.64 | 2.03 | 0.20 | 0.94 | 0.04  |
| 251 | <sup>t</sup> Bu | Me              | <sup>i</sup> Pr | 0.59 | 1.53 | 1.85 | 0.31 | 0.81 | 0.29  |
| 252 | Pr              | Me              | <sup>i</sup> Pr | 0.51 | 1.75 | 2.08 | 0.22 | 0.87 | 0.18  |
| 253 | <sup>i</sup> Pr | Me              | <sup>i</sup> Pr | 0.51 | 1.55 | 1.85 | 0.25 | 0.82 | 0.23  |
| 254 | OMe             | Me              | <sup>i</sup> Pr | 0.50 | 1.60 | 2.06 | 0.21 | 1.08 | 0.13  |
| 255 | OEt             | Me              | <sup>i</sup> Pr | 0.53 | 1.87 | 2.20 | 0.25 | 0.93 | 0.08  |
| 256 | Et              | Ph              | <sup>i</sup> Pr | 0.51 | 1.61 | 2.00 | 0.26 | 0.92 | -0.03 |
| 257 | <sup>t</sup> Bu | Ph              | <sup>i</sup> Pr | 0.65 | 1.50 | 1.87 | 0.44 | 0.86 | 0.15  |
| 258 | Pr              | Ph              | <sup>i</sup> Pr | 0.49 | 1.68 | 2.01 | 0.21 | 0.92 | 0.05  |
| 259 | OMe             | Ph              | <sup>i</sup> Pr | 0.56 | 1.56 | 2.06 | 0.23 | 1.10 | -0.07 |
| 260 | OEt             | Ph              | <sup>i</sup> Pr | 0.62 | 1.90 | 2.21 | 0.33 | 0.94 | -0.11 |
| 261 | <sup>t</sup> Bu | Et              | <sup>i</sup> Pr | 0.60 | 1.52 | 1.82 | 0.33 | 0.86 | 0.32  |

|     |                       |                       |            |      |      |      |      |      |       |
|-----|-----------------------|-----------------------|------------|------|------|------|------|------|-------|
| 262 | <b>iPr</b>            | <b>Et</b>             | <b>iPr</b> | 0.51 | 1.52 | 1.78 | 0.26 | 0.86 | 0.18  |
| 263 | <b>Pr</b>             | <b>Et</b>             | <b>iPr</b> | 0.47 | 1.71 | 2.06 | 0.23 | 0.92 | 0.22  |
| 264 | <b>OMe</b>            | <b>Et</b>             | <b>iPr</b> | 0.50 | 1.59 | 2.04 | 0.22 | 1.09 | 0.09  |
| 265 | <b>OEt</b>            | <b>Et</b>             | <b>iPr</b> | 0.59 | 1.90 | 2.21 | 0.30 | 0.93 | 0.07  |
| 266 | <b>iPr</b>            | <b>tBu</b>            | <b>iPr</b> | 0.77 | 1.40 | 1.68 | 0.47 | 0.79 | 0.36  |
| 267 | <b>OMe</b>            | <b>tBu</b>            | <b>iPr</b> | 0.76 | 1.45 | 1.91 | 0.47 | 0.90 | 0.25  |
| 268 | <b>OEt</b>            | <b>tBu</b>            | <b>iPr</b> | 0.81 | 1.80 | 2.08 | 0.51 | 0.84 | 0.25  |
| 269 | <b>Pr</b>             | <b>iPr</b>            | <b>iPr</b> | 0.61 | 1.63 | 1.95 | 0.23 | 0.87 | 0.27  |
| 270 | <b>OMe</b>            | <b>iPr</b>            | <b>iPr</b> | 0.68 | 1.44 | 1.96 | 0.34 | 0.99 | 0.14  |
| 271 | <b>OEt</b>            | <b>iPr</b>            | <b>iPr</b> | 0.73 | 1.81 | 2.10 | 0.37 | 0.87 | 0.18  |
| 272 | <b>OMe</b>            | <b>Pr</b>             | <b>iPr</b> | 0.61 | 1.64 | 2.11 | 0.21 | 1.00 | 0.14  |
| 273 | <b>OEt</b>            | <b>Pr</b>             | <b>iPr</b> | 0.65 | 2.01 | 2.27 | 0.24 | 0.94 | 0.12  |
| 274 | <b>CF<sub>3</sub></b> | <b>CF<sub>3</sub></b> | <b>iPr</b> | 0.90 | 1.89 | 2.24 | 0.37 | 1.12 | 0.37  |
| 275 | <b>CF<sub>3</sub></b> | <b>Me</b>             | <b>iPr</b> | 0.74 | 2.00 | 2.33 | 0.25 | 1.12 | 0.17  |
| 276 | <b>CF<sub>3</sub></b> | <b>Ph</b>             | <b>iPr</b> | 0.90 | 1.91 | 2.28 | 0.32 | 1.13 | 0.32  |
| 277 | <b>CF<sub>3</sub></b> | <b>tBu</b>            | <b>iPr</b> | 0.97 | 1.89 | 2.15 | 0.51 | 1.12 | 0.43  |
| 278 | <b>CF<sub>3</sub></b> | <b>Et</b>             | <b>iPr</b> | 0.90 | 1.89 | 2.25 | 0.29 | 1.12 | 0.43  |
| 279 | <b>CF<sub>3</sub></b> | <b>iPr</b>            | <b>iPr</b> | 0.88 | 1.86 | 2.16 | 0.35 | 1.12 | 0.29  |
| 280 | <b>CF<sub>3</sub></b> | <b>Pr</b>             | <b>iPr</b> | 0.85 | 2.00 | 2.36 | 0.26 | 1.16 | 0.39  |
| 281 | <b>CF<sub>3</sub></b> | <b>OMe</b>            | <b>iPr</b> | 0.89 | 1.89 | 2.24 | 0.32 | 1.19 | 0.28  |
| 282 | <b>CF<sub>3</sub></b> | <b>OEt</b>            | <b>iPr</b> | 0.91 | 2.02 | 2.38 | 0.42 | 1.13 | 0.32  |
| 283 | <b>H</b>              | <b>H</b>              | <b>tBu</b> | 0.64 | 1.86 | 2.21 | 0.43 | 1.16 | 0.01  |
| 284 | <b>Me</b>             | <b>Me</b>             | <b>tBu</b> | 0.53 | 1.74 | 2.05 | 0.23 | 1.05 | -0.01 |
| 285 | <b>Ph</b>             | <b>Ph</b>             | <b>tBu</b> | 0.56 | 1.75 | 2.08 | 0.39 | 1.07 | -0.04 |
| 286 | <b>Et</b>             | <b>Et</b>             | <b>tBu</b> | 0.53 | 1.72 | 2.06 | 0.32 | 1.05 | 0.00  |
| 287 | <b>tBu</b>            | <b>tBu</b>            | <b>tBu</b> | 0.76 | 1.74 | 1.96 | 0.53 | 0.99 | 0.01  |
| 288 | <b>Pr</b>             | <b>Pr</b>             | <b>tBu</b> | 0.63 | 1.70 | 2.01 | 0.27 | 0.97 | 0.02  |
| 289 | <b>iPr</b>            | <b>iPr</b>            | <b>tBu</b> | 0.63 | 1.78 | 2.05 | 0.42 | 1.04 | -0.02 |
| 290 | <b>OEt</b>            | <b>OEt</b>            | <b>tBu</b> | 0.78 | 2.00 | 2.30 | 0.51 | 1.11 | -0.07 |
| 291 | <b>Me</b>             | <b>H</b>              | <b>tBu</b> | 0.53 | 1.82 | 2.15 | 0.22 | 1.14 | -0.02 |
| 292 | <b>Et</b>             | <b>H</b>              | <b>tBu</b> | 0.52 | 1.84 | 2.18 | 0.28 | 1.15 | 0.04  |
| 293 | <b>tBu</b>            | <b>H</b>              | <b>tBu</b> | 0.69 | 1.81 | 2.07 | 0.49 | 1.05 | -0.01 |
| 294 | <b>iPr</b>            | <b>H</b>              | <b>tBu</b> | 0.57 | 1.84 | 2.19 | 0.40 | 1.13 | -0.02 |
| 295 | <b>Pr</b>             | <b>H</b>              | <b>tBu</b> | 0.60 | 1.77 | 2.11 | 0.25 | 1.09 | 0.10  |
| 296 | <b>OMe</b>            | <b>H</b>              | <b>tBu</b> | 0.65 | 1.94 | 2.32 | 0.45 | 1.19 | 0.01  |
| 297 | <b>OEt</b>            | <b>H</b>              | <b>tBu</b> | 0.72 | 2.04 | 2.33 | 0.45 | 1.16 | -0.07 |
| 298 | <b>Et</b>             | <b>Me</b>             | <b>tBu</b> | 0.50 | 1.70 | 2.06 | 0.22 | 1.04 | -0.03 |
| 299 | <b>tBu</b>            | <b>Me</b>             | <b>tBu</b> | 0.58 | 1.70 | 1.93 | 0.29 | 0.97 | -0.01 |
| 300 | <b>Pr</b>             | <b>Me</b>             | <b>tBu</b> | 0.53 | 1.74 | 2.01 | 0.24 | 0.95 | -0.02 |
| 301 | <b>iPr</b>            | <b>Me</b>             | <b>tBu</b> | 0.46 | 1.75 | 2.02 | 0.23 | 1.02 | 0.00  |
| 302 | <b>OMe</b>            | <b>Me</b>             | <b>tBu</b> | 0.54 | 1.92 | 2.23 | 0.23 | 1.16 | 0.03  |
| 303 | <b>OEt</b>            | <b>Me</b>             | <b>tBu</b> | 0.58 | 1.91 | 2.22 | 0.25 | 1.09 | -0.06 |
| 304 | <b>Et</b>             | <b>Ph</b>             | <b>tBu</b> | 0.51 | 1.72 | 2.04 | 0.33 | 1.05 | -0.07 |
| 305 | <b>tBu</b>            | <b>Ph</b>             | <b>tBu</b> | 0.61 | 1.71 | 1.96 | 0.40 | 1.00 | -0.04 |
| 306 | <b>iPr</b>            | <b>Ph</b>             | <b>tBu</b> | 0.49 | 1.76 | 2.04 | 0.30 | 1.05 | -0.14 |
| 307 | <b>OMe</b>            | <b>Ph</b>             | <b>tBu</b> | 0.57 | 1.93 | 2.25 | 0.36 | 1.16 | -0.05 |

|     |                 |                 |                 |      |      |      |      |      |       |
|-----|-----------------|-----------------|-----------------|------|------|------|------|------|-------|
| 308 | OEt             | Ph              | <sup>t</sup> Bu | 0.67 | 1.99 | 2.26 | 0.40 | 1.10 | -0.14 |
| 309 | <sup>t</sup> Bu | Et              | <sup>t</sup> Bu | 0.58 | 1.68 | 1.94 | 0.32 | 0.99 | 0.00  |
| 310 | <sup>i</sup> Pr | Et              | <sup>t</sup> Bu | 0.46 | 1.73 | 2.03 | 0.29 | 1.03 | -0.07 |
| 311 | Pr              | Et              | <sup>t</sup> Bu | 0.49 | 1.67 | 2.00 | 0.25 | 0.98 | 0.01  |
| 312 | OMe             | Et              | <sup>t</sup> Bu | 0.54 | 1.94 | 2.29 | 0.29 | 1.13 | 0.00  |
| 313 | OEt             | Et              | <sup>t</sup> Bu | 0.64 | 1.97 | 2.28 | 0.37 | 1.08 | -0.08 |
| 314 | <sup>i</sup> Pr | <sup>t</sup> Bu | <sup>t</sup> Bu | 0.75 | 1.76 | 1.95 | 0.48 | 0.99 | 0.02  |
| 315 | Pr              | <sup>t</sup> Bu | <sup>t</sup> Bu | 0.68 | 1.70 | 1.99 | 0.24 | 0.95 | 0.03  |
| 316 | OEt             | <sup>t</sup> Bu | <sup>t</sup> Bu | 0.79 | 1.97 | 2.18 | 0.53 | 1.02 | -0.05 |
| 317 | Pr              | <sup>i</sup> Pr | <sup>t</sup> Bu | 0.56 | 1.73 | 2.01 | 0.26 | 0.97 | -0.01 |
| 318 | OMe             | <sup>i</sup> Pr | <sup>t</sup> Bu | 0.65 | 1.93 | 2.31 | 0.45 | 1.12 | -0.03 |
| 319 | OEt             | <sup>i</sup> Pr | <sup>t</sup> Bu | 0.78 | 2.00 | 2.30 | 0.42 | 1.08 | -0.03 |
| 320 | OMe             | Pr              | <sup>t</sup> Bu | 0.64 | 1.85 | 2.19 | 0.27 | 1.06 | 0.01  |
| 321 | OEt             | Pr              | <sup>t</sup> Bu | 0.69 | 2.06 | 2.19 | 0.29 | 0.99 | -0.06 |
| 322 | OEt             | OMe             | <sup>t</sup> Bu | 0.76 | 1.99 | 2.32 | 0.50 | 1.16 | -0.07 |
| 323 | CF <sub>3</sub> | CF <sub>3</sub> | <sup>t</sup> Bu | 0.93 | 1.90 | 2.25 | 0.55 | 1.16 | 0.34  |
| 324 | CF <sub>3</sub> | H               | <sup>t</sup> Bu | 0.88 | 1.91 | 2.28 | 0.50 | 1.20 | 0.18  |
| 325 | CF <sub>3</sub> | Ph              | <sup>t</sup> Bu | 0.93 | 1.82 | 2.15 | 0.46 | 1.16 | 0.39  |
| 326 | CF <sub>3</sub> | <sup>t</sup> Bu | <sup>t</sup> Bu | 0.97 | 1.90 | 2.14 | 0.55 | 1.16 | 0.28  |
| 327 | CF <sub>3</sub> | Et              | <sup>t</sup> Bu | 0.93 | 1.81 | 2.21 | 0.37 | 1.14 | 0.41  |
| 328 | CF <sub>3</sub> | <sup>i</sup> Pr | <sup>t</sup> Bu | 0.85 | 1.94 | 2.22 | 0.49 | 1.17 | 0.21  |
| 329 | CF <sub>3</sub> | Pr              | <sup>t</sup> Bu | 0.89 | 1.93 | 2.27 | 0.34 | 1.16 | 0.35  |
| 330 | CF <sub>3</sub> | OEt             | <sup>t</sup> Bu | 0.97 | 2.05 | 2.45 | 0.55 | 1.19 | 0.33  |

## H. DFT validation of ML predicted energies of all the descriptors.

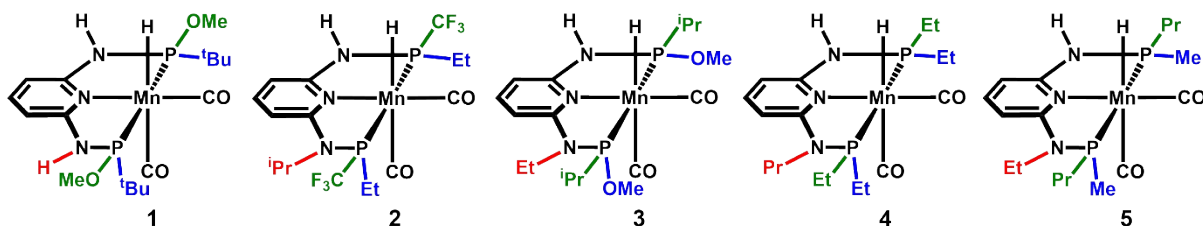

Fig. S3 Considered catalysts for the DFT validation of ML predicted energies of all the descriptors.

Table S6. Comparison of DFT calculated and ML predicted results for all the catalysts mentioned in Fig. S3. All the energies are in eV.

| Catalysts | $\Delta G^{\ddagger TS1}$ |      | $\Delta G^{\ddagger TS2}$ |      | $\Delta G^{\ddagger TS3}$ |       |
|-----------|---------------------------|------|---------------------------|------|---------------------------|-------|
|           | DFT                       | ML   | DFT                       | ML   | DFT                       | ML    |
| 1         | 0.39                      | 0.49 | 1.03                      | 0.96 | -0.01                     | 0.01  |
| 2         | 0.44                      | 0.29 | 1.13                      | 1.12 | 0.38                      | 0.43  |
| 3         | 0.46                      | 0.36 | 0.99                      | 1.05 | -0.06                     | -0.02 |
| 4         | 0.39                      | 0.24 | 1.02                      | 1.02 | -0.02                     | 0.02  |
| 5         | 0.29                      | 0.25 | 1.01                      | 0.91 | -0.01                     | 0.01  |

## I. Proposed best performing catalysts to produce HCOOH from CO<sub>2</sub>.

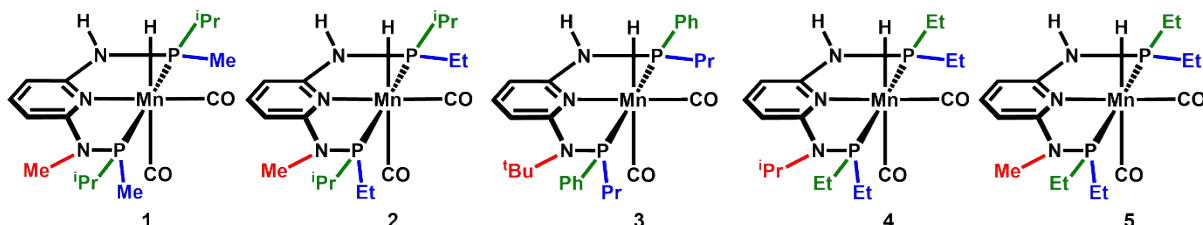

Fig. S4. DFT+ML predicted best catalysts to produce HCOOH.

## J. Natural bond orbital (NBO) analysis of catalysts

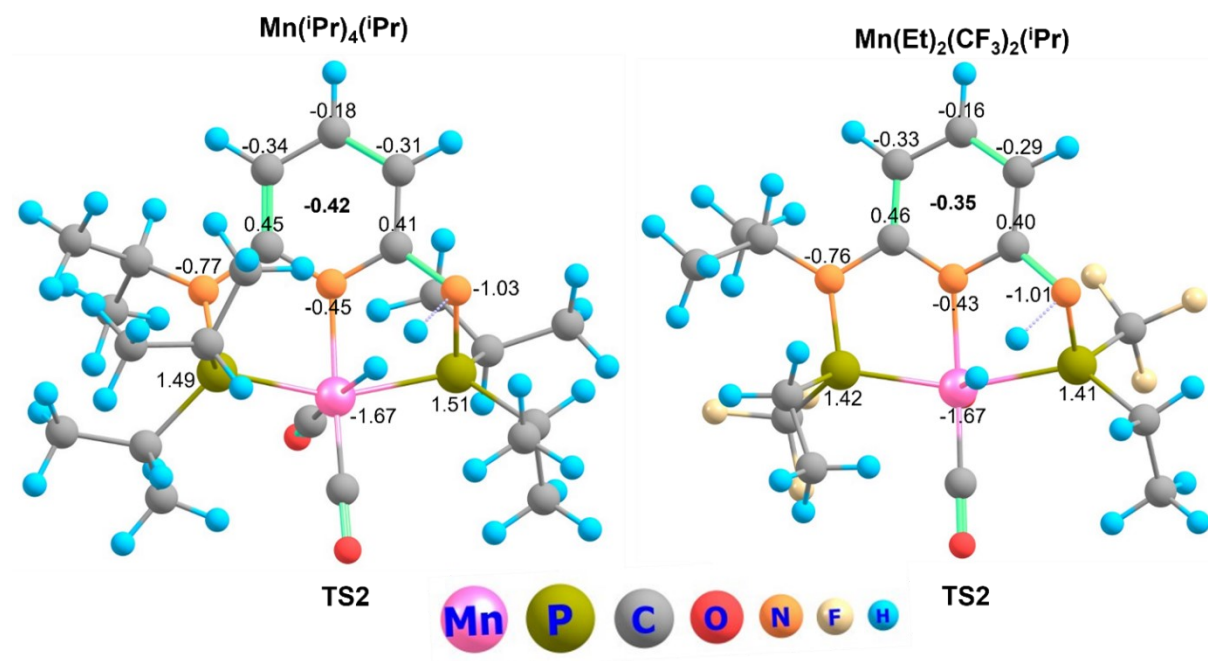

Fig. S5 NBO analysis of catalysts.
